# Supplementary material for: Disassembly and rewiring of a mature converging excitatory circuit following injury
Source: PubMed Central journal article supplement (PMC8381591; doi:10.1016/j.celrep.2021.109463), 2021-08-03
Supplement: NIHMS1730370-supplement-1.pdf [file NIHMS1730370-supplement-1.pdf]

**Cell Reports, Volume 36**

**Supplemental information**

**Disassembly and rewiring of a mature  
converging excitatory circuit following injury**

**Luca Della Santina, Alfred K. Yu, Scott C. Harris, Manuel Soliño, Tonatiuh Garcia Ruiz, Jesse Most, Yien-Ming Kuo, Felice A. Dunn, and Yvonne Ou**

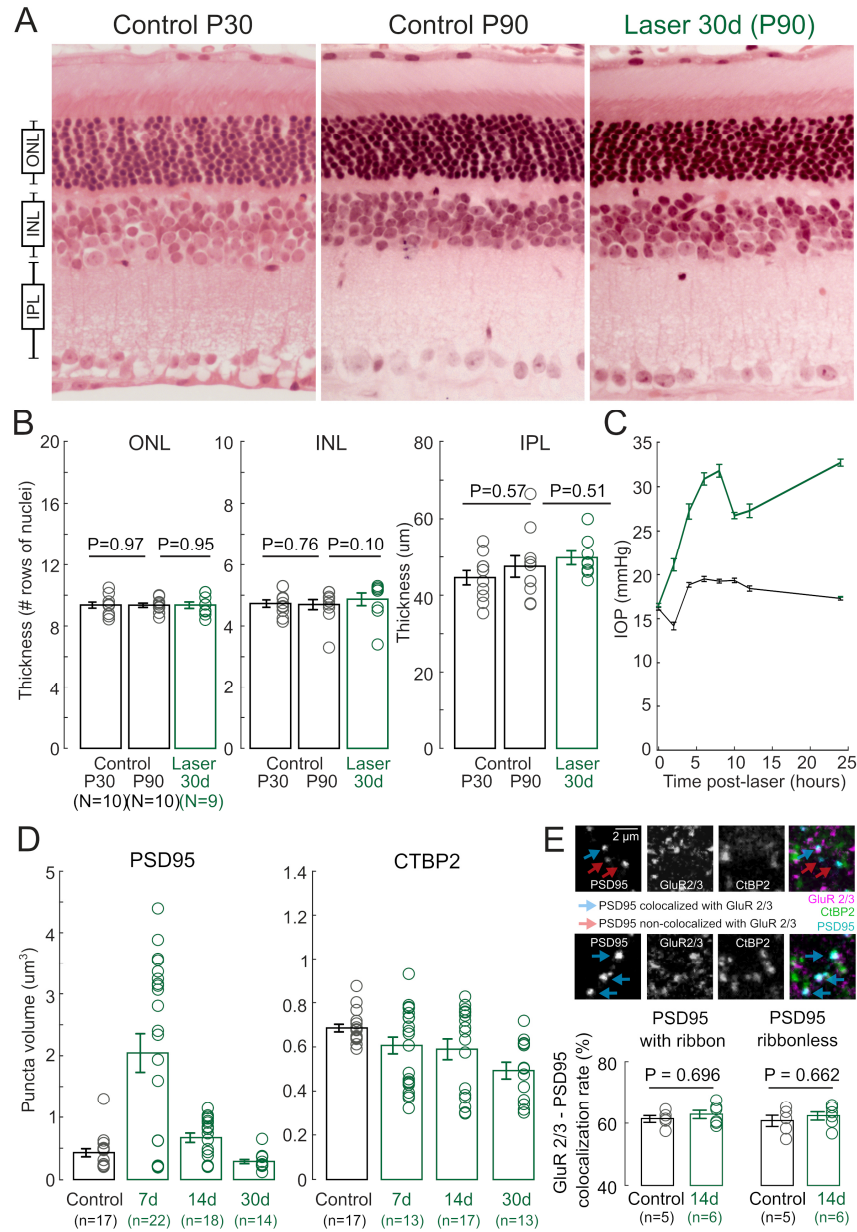

**Figure S1. Characterization of the LIOH model, Related to Figure 1**

**A:** Representative vertical sections from control retinas at P30 (left), P90 (middle) and after 30 days from laser (age P90, right) labelled with Hematoxylin-Eosin. ONL (outer nuclear layer, INL (inner nuclear layer) and IPL (inner plexiform layer) limits are delineated next to the sample images.

**B:** Thickness of nuclear layers (ONL, INL) and synaptic layer (IPL). N = number of animals.

**C:** Intraocular pressure profile in the first 24 hours following laser induced ocular hypertension. Lasered eyes (green) versus contralateral control eyes (black). N=8 animals.

**D:** Volume of PSD95 puncta expressed by  $A_{ON-S}$  RGCs (left panel) and volume of CtBP2 puncta in the corresponding IPL sublamina. n=number of  $A_{ON-S}$  RGCs analyzed from N=13 animals per group.

**E:** Colocalization rates of ribbon-apposed and ribbonless PSD95 with GluR 2/3 receptors in individual AON-S RGCs from control retinas and after 14 days from laser. n = number of cells from N = 5 animals. Top panels: example of individual PSD95 puncta either colocalized (blue arrow) or non-colocalized (red arrow) with GuR 2/3. Bar plots: mean±SEM. Circles: Individual values. P-values: Rank-sum comparisons between groups indicated by lines.

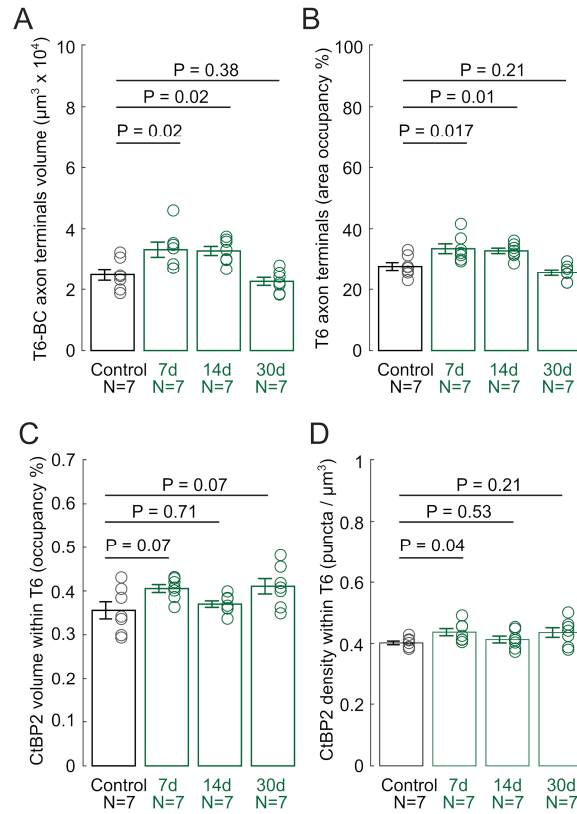

**Figure S2. Axon terminals of T6-BCs, Related to Figure 2**

**A:** T6-BC cell axon terminal volume within a  $200 \times 200 \mu\text{m}$  IPL region of the whole mount retina. N=number of animals.

**B:** T6-BC axon terminal area occupancy within a  $200 \times 200 \mu\text{m}$  IPL region (projection along IPL depth) of the whole mount retina. N=number of animals.

**C:** Volume occupancy of CtBP2 within T6-BC axon terminals. N = number of animals.

**D:** Density of CtBP2 within T6-BC axon terminals. N = number of animals.

Bar plots: mean $\pm$ SEM. Circles: Individual values. P-values: Rank-sum comparisons between groups indicated by lines.

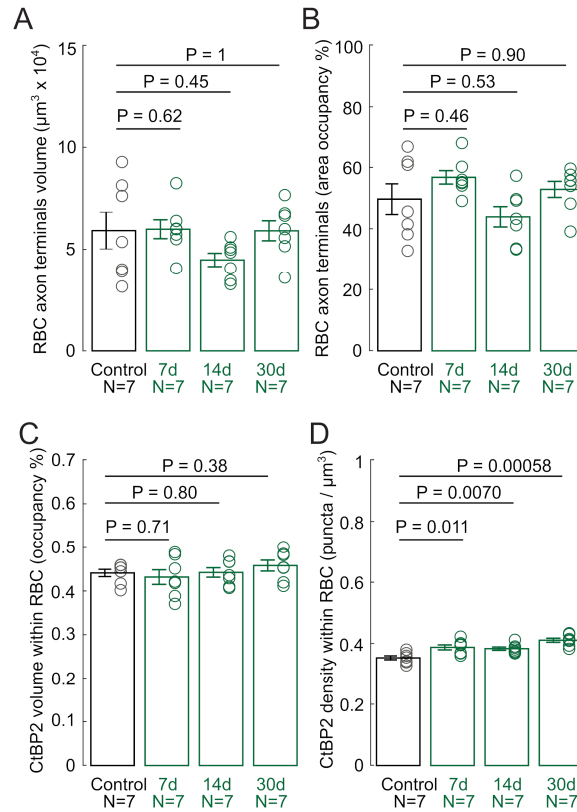

**Figure S3. Axon terminals of RBCs, Related to Figure 3**

**A:** RBC axon terminal volume within a  $200 \times 200 \mu\text{m}$  IPL region of the whole mount retina. N=number of animals.

**B:** RBC axon terminal area occupancy within a  $200 \times 200 \mu\text{m}$  IPL region (projection along IPL depth) of the whole mount retina. N=number of animals.

**C:** Volume occupancy of CtBP2 within RBC axon terminals. N=number of animals.

**D:** Density of CtBP2 within RBC axon terminals. N=number of animals.

Histograms: mean $\pm$ SEM. Circles: Individual values. P-values: Rank-sum comparisons between groups indicated by lines.

**Table S1. PSD95 density on A<sub>ON-S</sub> RGCs, Related to Figure 1.**

Absolute number of PSD95 puncta per A<sub>ON-S</sub> RGC for each experimental group. Related to Figure 1.

|                 | PSD95 density per unit-length dendrite (puncta/ $\mu\text{m}$ ; mean $\pm$ SEM) |
|-----------------|---------------------------------------------------------------------------------|
| <b>Control</b>  | 0.507 $\pm$ 0.026                                                               |
| <b>LIOH 7d</b>  | 0.264 $\pm$ 0.034                                                               |
| <b>LIOH 14d</b> | 0.288 $\pm$ 0.045                                                               |
| <b>LIOH 30d</b> | 0.373 $\pm$ 0.038                                                               |

**Table S2. Intensity-response values for A<sub>ON-S</sub> RGCs peak currents across rod and cone-mediated light levels, Related to Figure 4.**

Light levels and peak response currents measured in whole-cell voltage-clamp recordings of A<sub>ON-S</sub> RGCs at -60mV to isolate excitatory currents.

| CONTROL                                                           |                               | LIOH                                                             |                             |
|-------------------------------------------------------------------|-------------------------------|------------------------------------------------------------------|-----------------------------|
| Rod intensities (Rh*/rod = isomerizations per rod; mean±SEM)      | Peak current (pA; mean ± sem) | Rod intensities (Rh*/rod = isomerizations per rod; mean±SEM)     | Peak current (pA; mean±SEM) |
| 0.002±1.9e-05                                                     | 26.33±6.20                    | 0.002±0                                                          | 15.56±5.05                  |
| 0.007±6.39e-04                                                    | 346.19±166.94                 | 0.007±0.001                                                      | 67.52±35.28                 |
| 0.018±1.52e-04                                                    | 616.25±338.96                 | 0.017±0.001                                                      | 35.97±12.67                 |
| 0.055±0.005                                                       | 890.67±265.43                 | 0.061±0.004                                                      | 151.16±26.32                |
| 0.221±0.020                                                       | 1157.18±289.23                | 0.19±0.014                                                       | 249.02±39.87                |
| 0.588±0.005                                                       | 1259.63±431.77                | 0.514±0.033                                                      | 301.54±39.30                |
| 1.18±0.01                                                         | 1318.58±428.06                | 1.91±0.14                                                        | 372.06±51.68                |
|                                                                   |                               | 5.35±0.11                                                        | 425.57±97.21                |
| Cone intensities (P*/cone = isomerizations per S cone ; mean±SEM) | Peak current (pA; mean±SEM)   | Cone intensities (P*/cone = isomerizations per S cone; mean±SEM) | Peak current (pA; mean±SEM) |
| 0.016±0.001                                                       | 15.66±2.86                    | 0.015±0.002                                                      | 7.50±1.26                   |
| 0.065±0.006                                                       | 63.23±16.76                   | 0.08±0.005                                                       | 12.42±2.45                  |
| 0.17±0.002                                                        | 375.73±73.72                  | 0.18±0.002                                                       | 20.30±5.64                  |
| 0.52±0.048                                                        | 1139.61±155.96                | 0.53±0.03                                                        | 71.81±20.69                 |
| 2.07±0.19                                                         | 1896.46±212.34                | 2.12±0.14                                                        | 242.73±62.91                |
| 5.51±0.06                                                         | 2152.06±347.91                | 5.46±0.07                                                        | 357.19±121.33               |
|                                                                   |                               | 17.24±1.26                                                       | 497.21±102.96               |
|                                                                   |                               | 45.97±0.45                                                       | 518.42±152.90               |
